# Supplementary material
Source: PubMed Central journal article supplement (PMC9004404)
Supplement: aem.00064-22-s0001.pdf [file aem.00064-22-s0001.pdf]

**Role of the transcriptional regulator ArgR in the connection between arginine  
metabolism and c-di-GMP signaling in *Pseudomonas putida***

Laura Barrientos-Moreno, María Antonia Molina-Henares, María Isabel Ramos-González,  
Manuel Espinosa-Urgel

**SUPPLEMENTARY MATERIAL**

**A**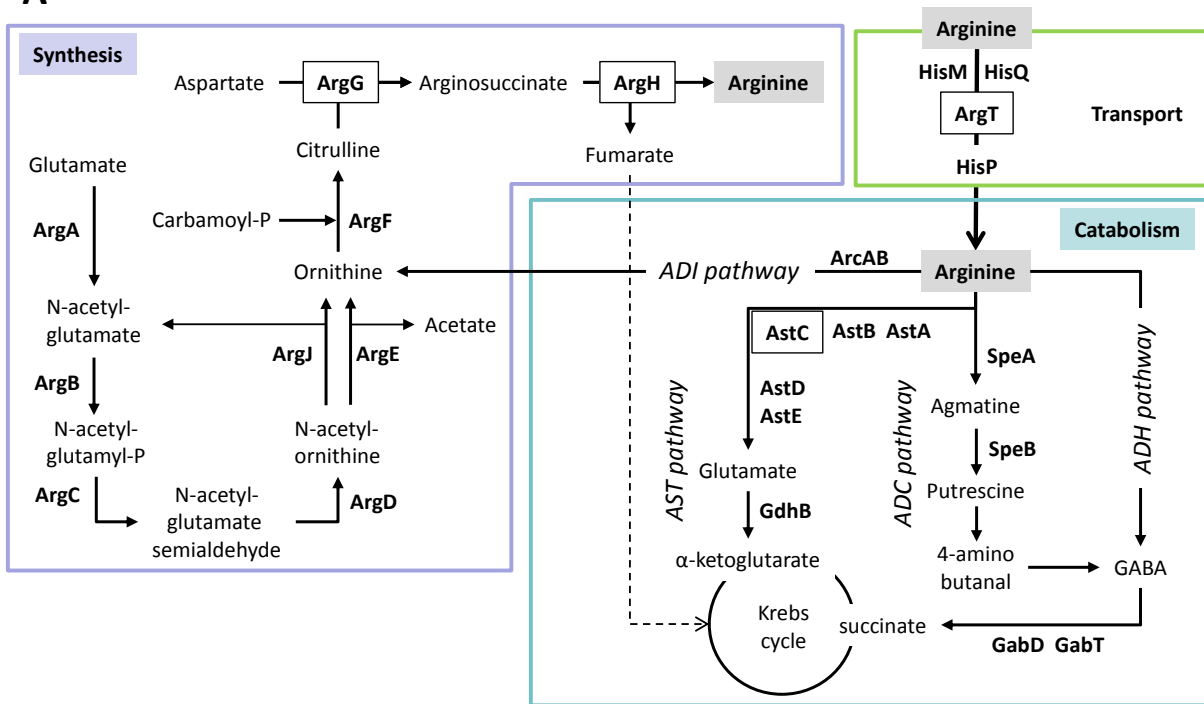**B**

KT2440 MTTQ--RIGFLIWPSTRPLTLALAEVLLVAQRVHPDVVYELVFLQAE-PAQEGAWRLPGEPWTGR  
 PA01 MTAQPQRIGFLIWPATRALTLALAEALRAARRLHPEALYEPLFLFLAEAPAEFEWGRLPGTAWNDR

KT2440 LEGCHKLFLLADEPPAAMGAAFSAALKQLARSGCLIGGLSAGVYPLAMLGLLDGYRAAVHWRWQDD  
 PA01 LEQCSRLLFLVADEAPAAVSPALGLALKQLARSGAALIGALSAGIYPLAQLGLLDGYRAAVHWRWHDD

KT2440 FAERFPKVIATSHLFDWDRDRLTACGGMAVTDLLLAVLARDHGAEELAGAVSEELVVERIREGGERQ  
 PA01 FTERFPKVIATNHLFEWDRDRMTACGGMAVLDLLLAALLSRDHGAEELAGAVSEELVVERIREGNRQ

KT2440 RIPLQNRGLGSSHPKLTQAVLLMEANIEEPLTTDEIAQHVCVSRRLERIFKQYLN RVPSQYYLELR  
 PA01 RIPLKNRGLGSSHPKLTQAVLLMEANIEEPLTTDEIAQHVCVSRRLERIFKQYLN RVPSQYYLELR

KT2440 LNKARQMLMQTSKSI IQIGLSCGFSSGPHFSSAYRNFFGATPREDRNQRRSSSPFELSSAPAEKG  
 PA01 LNRARQMLMQTSKSI IQIGLSCGFSSGPHFSSAYRNFFGVTPREDRNQRRGGSAPFETTFPVERG

**C**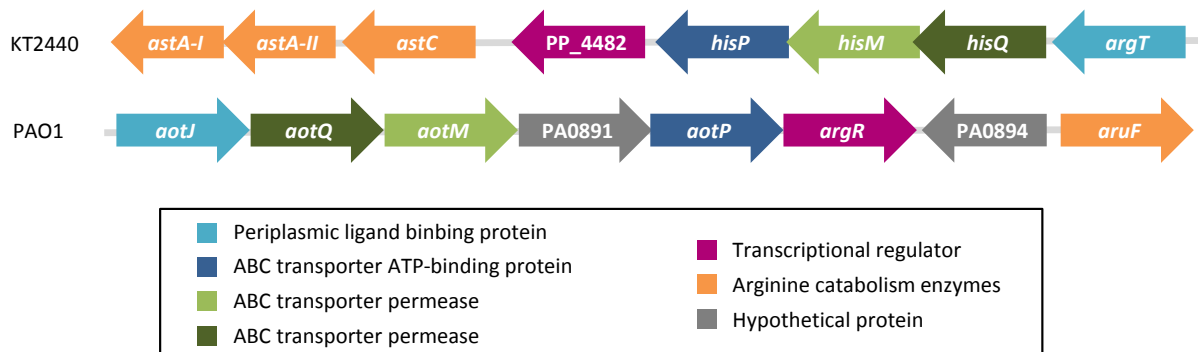

**Figure S1** (previous page). **A.** Schematic view of arginine biosynthesis, catabolism and transport. Elements mentioned in the text connected with ArgR regulation are boxed. **B.** Sequence alignment of PP\_4482 (ArgR) from *P. putida* KT2440 and ArgR from *P. aeruginosa* PAO1, done using CLUSTALW (<https://www.genome.jp/tools-bin/clustalw>). Identical residues in both proteins are highlighted in yellow and conservative residues in cyan. **C.** Comparison of the genomic organization of the chromosomal region containing the locus PP\_4482 and putative arginine transport system in *P. putida* KT2440 (top) and the *aotJQMOP-argR* cluster in *P. aeruginosa* PAO1 (bottom). Arrows with the same color indicate gene homology. Predicted functions of the genes are indicated. Data and gene nomenclatures were obtained from the *Pseudomonas* genome database ([www.pseudomonas.com](http://www.pseudomonas.com); 1).

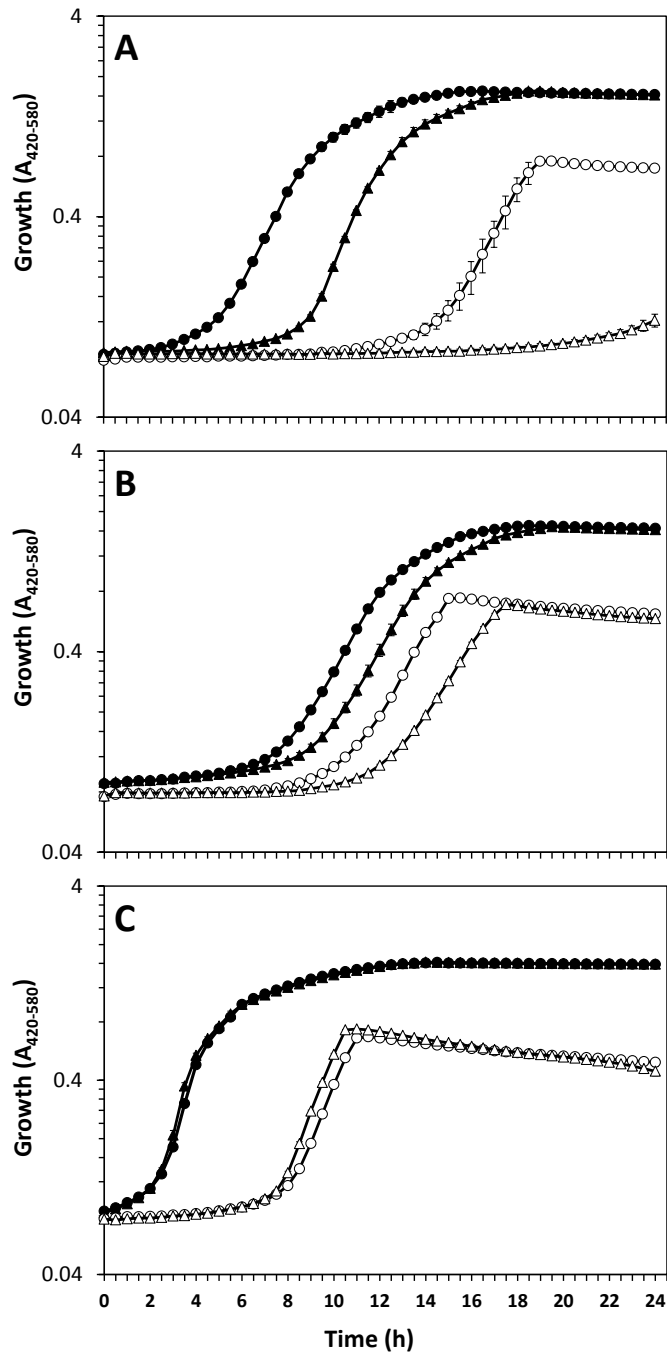

**Figure S2.** Growth of KT2440 (circles) and  $\Delta argR$  (triangles) with different amino acids as carbon (open symbols) or nitrogen (filled symbols) source. L-ornithine (A), L-lysine (B) or L-histidine (C) were added (10 mM final concentration) to M9 or M8 with glucose (20 mM) media and growth at 30°C with shaking was followed using a Bioscreen™ apparatus. Absorbance in the 420-580 nm range was measured every 30 min. Averages and standard deviations of one representative experiment with three technical replicates are plotted.

| gene        | predicted ARG boxes                                                                                                                | Distance to ATG (bp) |
|-------------|------------------------------------------------------------------------------------------------------------------------------------|----------------------|
| <i>argG</i> | TGTCGC <b>TTT</b> TGTCG <b>TCA</b> GAAGC <b>TGTCG</b> CCCCACT <b>G<b>TAA</b></b>                                                   | 59                   |
| <i>argT</i> | TCAGGC <b>G</b> CCTTCTAT <b>AA</b> GTAGT <b>TGTCGC</b> TTTGAA <b>GAA</b> AATATCGACTACCGGGC <b>TGTCG</b> TTAAAAT <b>G<b>CCA</b></b> | 117                  |
| <i>astC</i> | TGTCGCATTGCC <b>GAA</b> GCCT- <b>TGTC</b> AAA <b>ACTGG</b> TTTTGCGCTGTAACAAGT <b>TGTCGC</b> TTGGCC <b>G<b>CAA</b></b>              | 78                   |
| <i>spuE</i> | TTT <b>TGC</b> GTGTGCG <b>GCA</b> GCAT- <b>TGTCGC</b> TACCC <b>G<b>GCA</b></b>                                                     | 50                   |
| <i>argS</i> | TGCCGC <b>TTGTGG</b> CCCCCAGCT <b>TGCCG</b> CCCCAA <b>G<b>GTTG</b></b>                                                             | 91                   |

**Figure S3.** Potential ARG boxes identified in the upstream region of genes related to arginine metabolism in *P. putida* KT2440. Bases identical to the *P. aeruginosa* consensus sequence (2) are indicated in boldface. Highlighted bases correspond to the predicted half-sites.

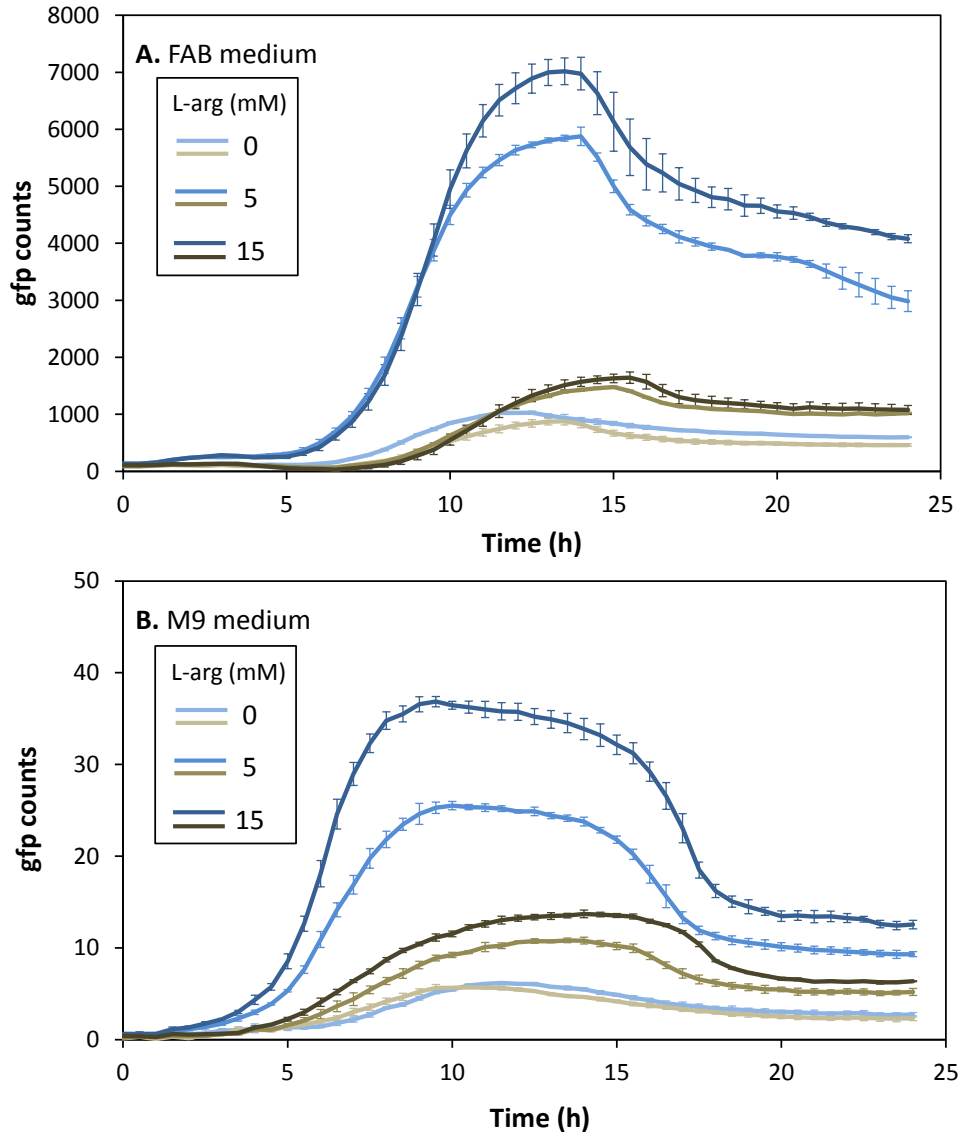

**Figure S4.** C-di-GMP levels in KT2440 (blue) and the  $\Delta argR$  (olive) mutant in response to L-arginine. Strains harboring pCdrA::*gfp<sup>C</sup>* were grown in modified FAB (3) (A) and M9 (B) minimal media with glucose supplied with different final concentrations of L-arginine (0, 5, and 15 mM) for 24 h. The data are presented as GFP counts which indicate fluorescence values normalized by growth ( $OD_{600nm}$ ) and correspond to averages and standard deviations of one representative experiment using three experimental replicates per condition. Line color intensity indicates increasing concentrations of the amino acid. Measurements were done using TECAN Infinite 200 (A) and Varioskan Lux (B) fluorimeters.

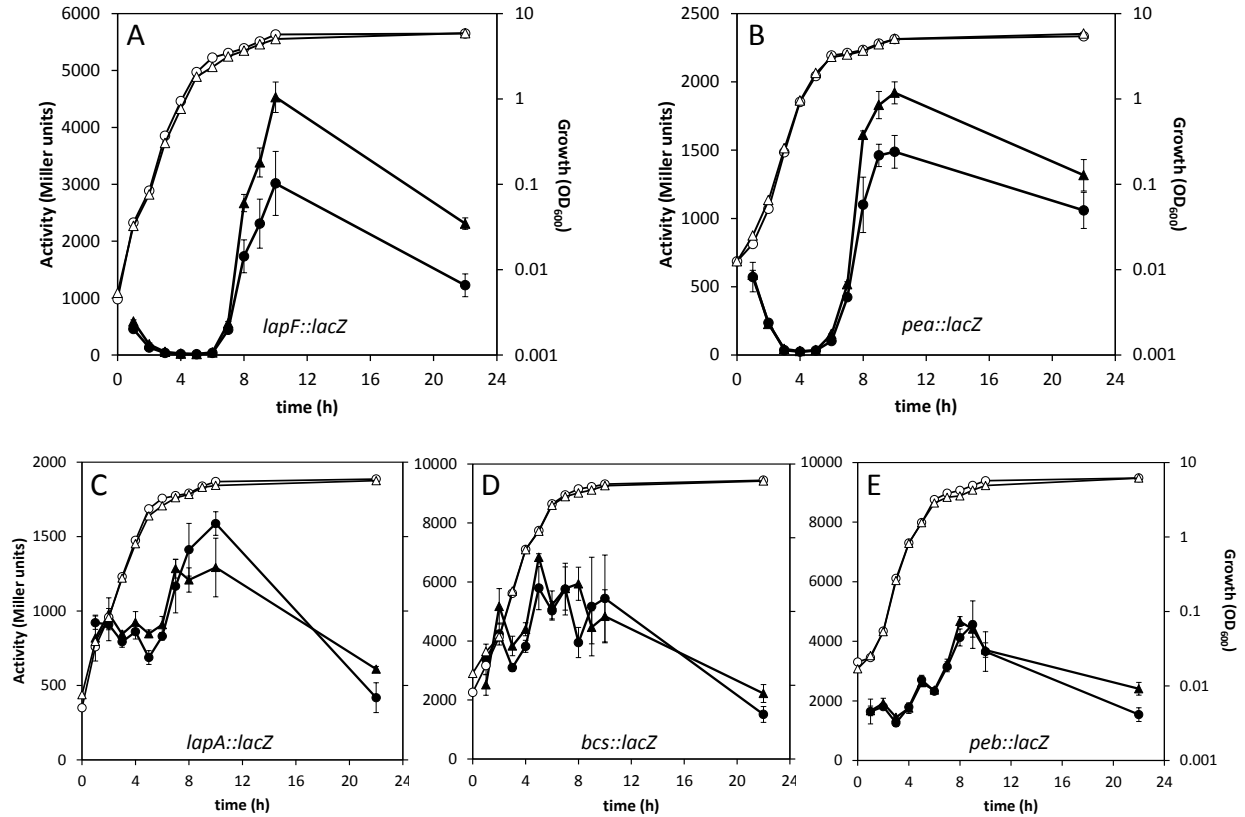

**Figure S5.** Expression pattern of *lapF* (A), *pea* (B), *lapA* (C), *bcs* (D) and *peb* (E) transcriptional fusions (4,5) to *lacZ* in KT2440 (circles) and the  $\Delta argR$  mutant (triangles). Growth (open symbols) and activity (closed symbols) were followed over time in LB. Results are averages and standard deviations from 2 independent experiments with three technical replicates each.

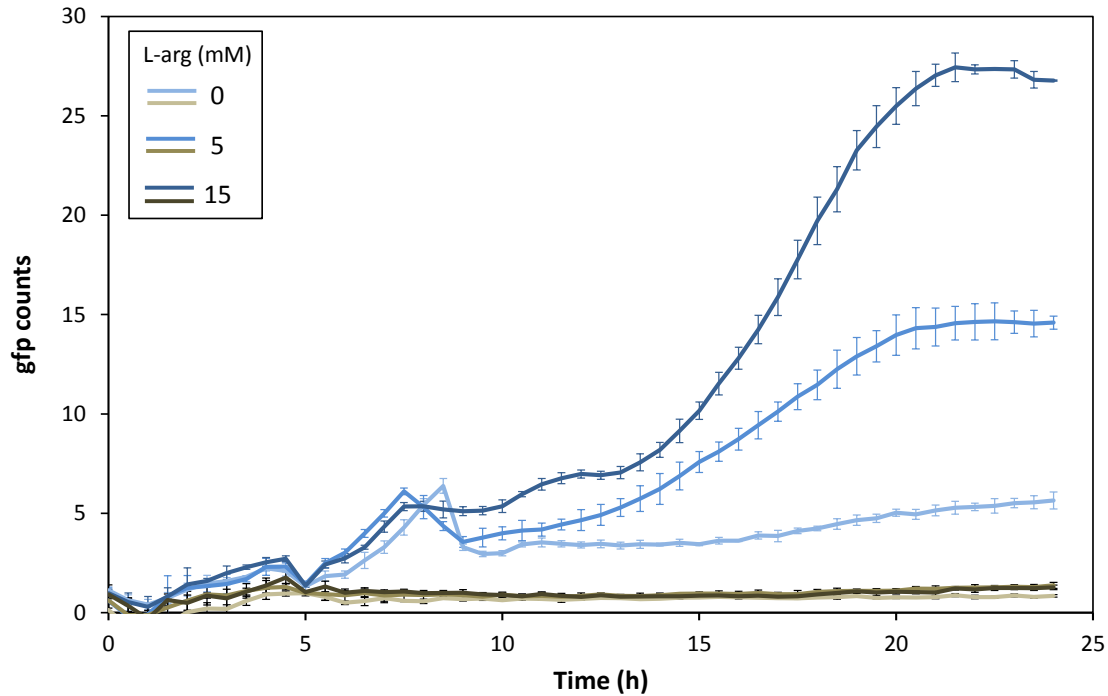

**Fig S6.** The change in c-di-GMP levels in response to L-arginine requires *cfcR* and *argR*. KT2440 (blue) and a  $\Delta argR\Delta cfcR$  mutant (olive) harboring pCdrA::*gfp<sup>C</sup>* (6) were grown for 24 h in 96-well plates in diluted LB (1:3) supplied with different final concentrations of L-arginine (0, 5, and 15 mM), and fluorescence and growth ( $OD_{600}$ ) were recorded every 30 min. Data are presented as *gfp* counts, which correspond to fluorescence values normalized by growth ( $OD_{600}$ ), and are the averages and standard deviations of one representative experiment using three experimental replicates per condition. Line color intensity indicates increasing concentrations of the amino acid. Measurements were done using a Varioskan Lux fluorimeter.



## REFERENCES

1. Winsor GL, Griffiths EJ, Lo R, Dhillon BK, Shay JA, Brinkman FS. 2016. Enhanced annotations and features for comparing thousands of *Pseudomonas* genomes in the *Pseudomonas* genome database. *Nucleic Acids Res* 44:D646–D653.
2. Lu CD, Yang Z, Li W. 2004. Transcriptome analysis of the ArgR regulon in *Pseudomonas aeruginosa*. *J Bacteriol* 186:3855-3861.
3. Heydorn A, Nielsen AT, Hentzer M, Sternberg C, Givskov M, Ersbøll BK, Molin S. 2000. Quantification of biofilm structures by the novel computer program COMSTAT. *Microbiology* 146:2395–2407.
4. Martínez-Gil M, Ramos-González MI, Espinosa-Urgel M. 2014. Roles of cyclic di-GMP and the Gac system in transcriptional control of the genes coding for the *Pseudomonas putida* adhesins LapA and LapF. *J Bacteriol* 196:1484-1495.
5. Molina-Henares MA, Ramos-González MI, Daddaoua A, Fernández-Escamilla AM, Espinosa-Urgel M. 2017. FleQ of *Pseudomonas putida* KT2440 is a multimeric cyclic diguanylate binding protein that differentially regulates expression of biofilm matrix components. *Res Microbiol* 168:36-45.
6. Rybtke MT, Borlee BR, Murakami K, Irie Y, Hentzer M, Nielsen TE, Givskov M, Parsek MR, Tolker-Nielsen T. 2012. Fluorescence-based reporter for gauging cyclic di-GMP levels in *Pseudomonas aeruginosa*. *Appl Environ Microbiol* 78:5060-5069.
